# Supplementary material for: Detecting Disease Association With Rare Variants Using Weighted Entropy
Source: Research Square preprint supplement (doi:10.21203/rs.3.rs-956366/v1), 2021-11-10
Supplement: Supplementary file 2 [file 7ae4d62beebbe0c7e3fecde2.docx]

(A1)

(A2)

(A3)

(A4)

(A5)

(A6)

(B1)

(B2)

(B3)

(B4)

(B5)

(B6)

**Figure S1.** QQ plots. A1, A2, and A3 are for rare, rare and common, common when sample size is 1000 and=0, respectively. A3, A4, and A5 are for rare, rare and common, common when sample size is 1000 and=0.6, respectively. B1, B2, and B3 are for rare, rare and common, common when sample size is 1600 and=0, respectively. B3, B4, and B5 are for rare, rare and common, common when sample size is 1600 and=0.6, respectively.
